# Supplementary material for: Structural Properties of Thin ZnO Films Deposited by ALD under O-Rich and Zn-Rich Growth Conditions and Their Relationship with Electrical Parameters
Source: MDPI journal article supplement (doi:10.3390/ma14144048), 2021-07-20

Figure S1. XRD analysis of as grown (a-f) and annealed (g-l) ZnO/Si

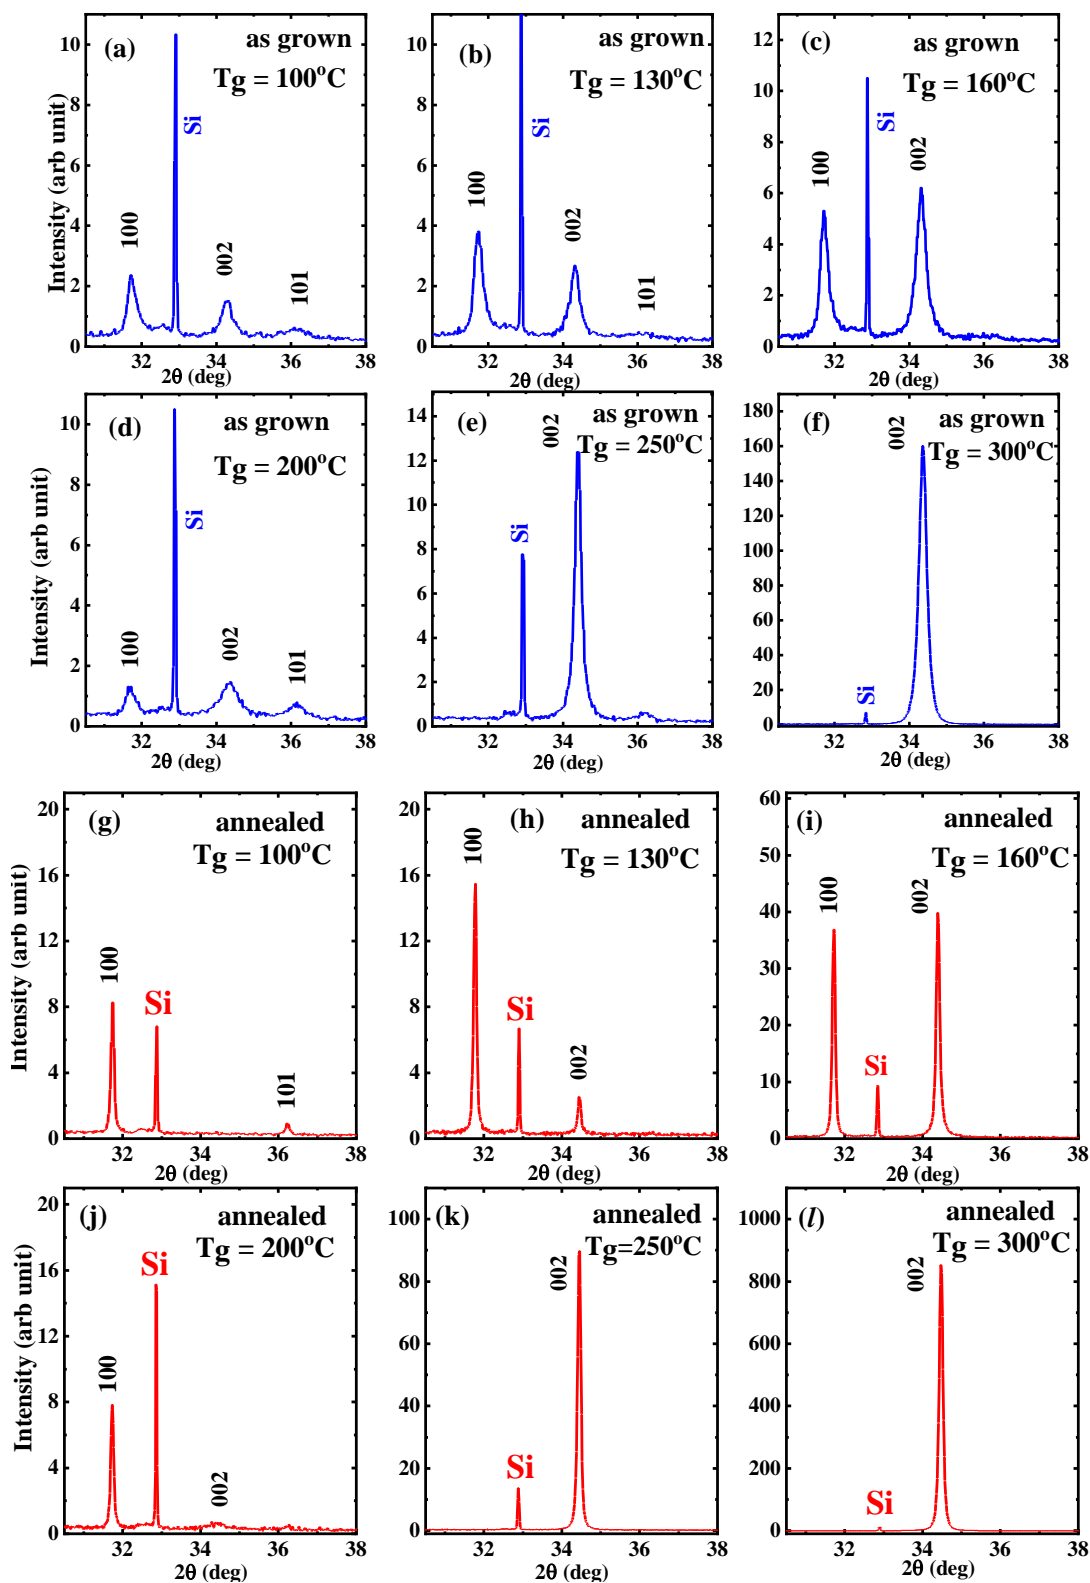

Figure S2. XRD analysis of as grown (a-f) and annealed (g-l) ZnO/a-Al<sub>2</sub>O<sub>3</sub>

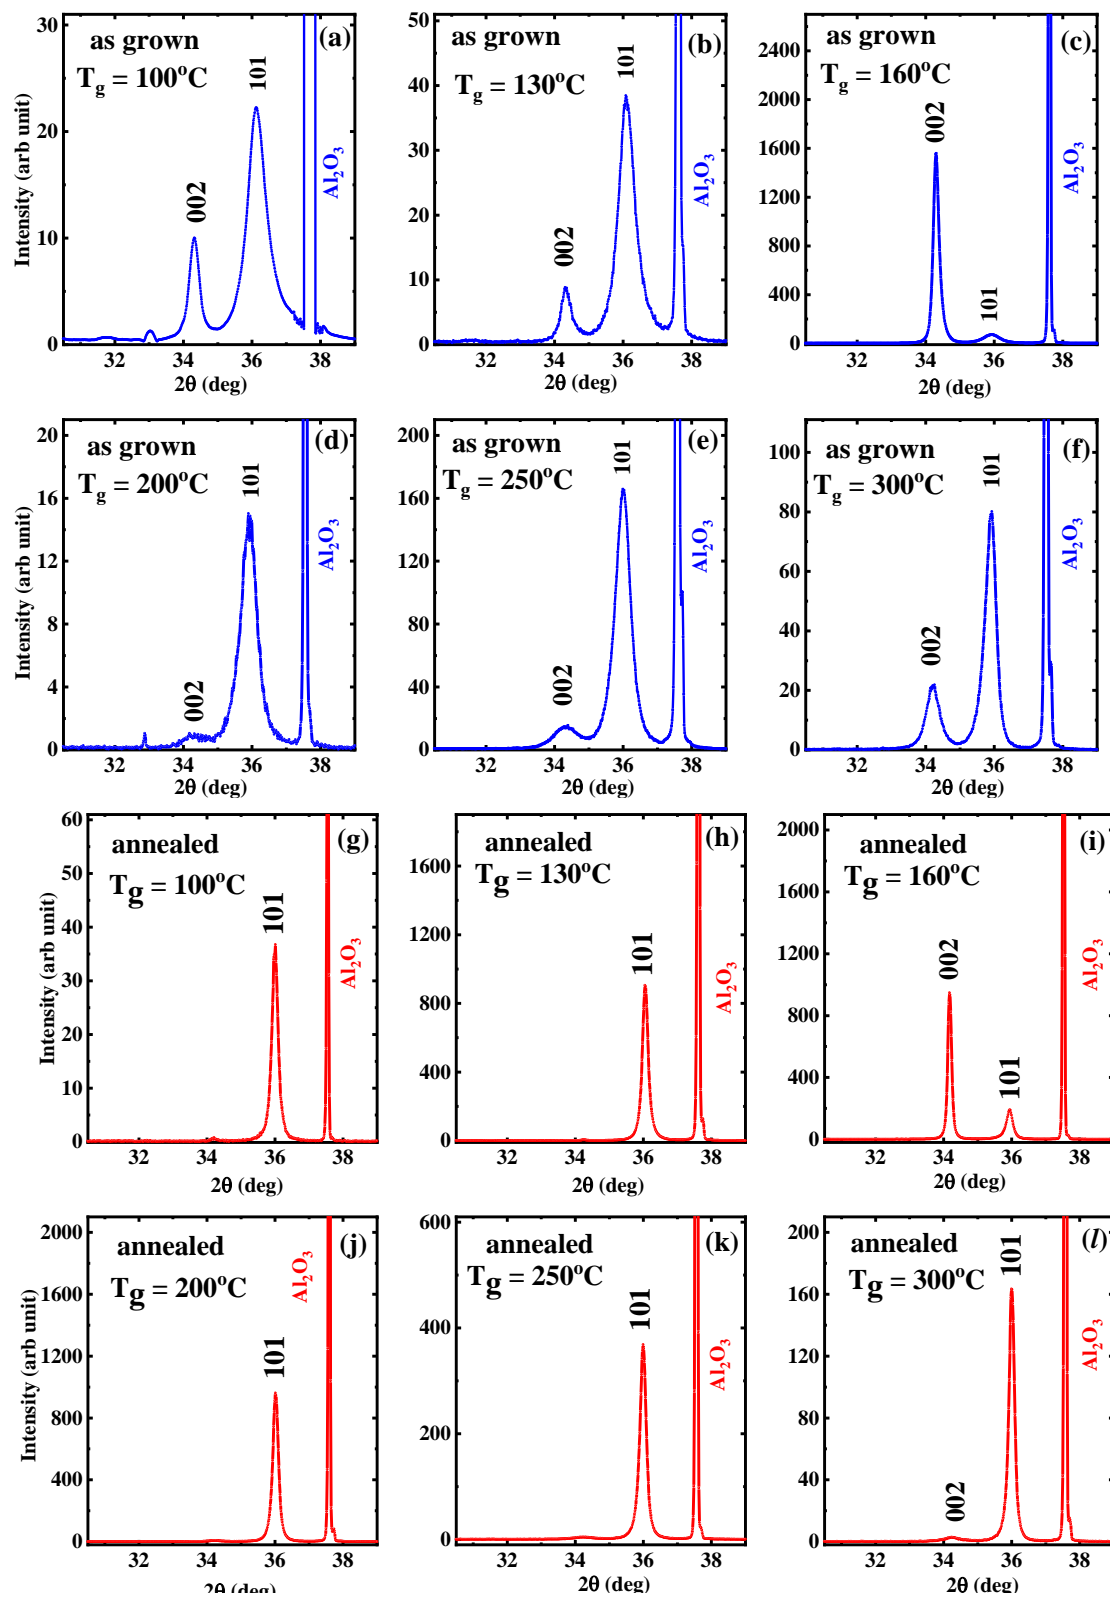

Supplement: s1 [file s1]
